# Supplementary material for: 8-(p-CF3-cinnamyl)-modified purine nucleosides as promising fluorescent probes
Source: Royal Society of Chemistry journal article supplement (doi:10.1039/c1ob05681f), 2011-01-01

# 8-(*p*-CF<sub>3</sub>-cinnamyl)-modified purine nucleosides as promising fluorescent probes

*Lital Zilbershtein,<sup>‡</sup> Alon Silberman,<sup>‡</sup> and Bilha Fischer<sup>‡\*</sup>*

<sup>‡</sup>Department of Chemistry, Gonda-Goldschmied Medical Research Center,  
Bar-Ilan University, Ramat-Gan 52900, Israel

## Supporting Information

<sup>1</sup>H NMR and <sup>13</sup>C NMR spectra for reported compounds

### Table of Contents

|                  |     |
|------------------|-----|
| Compound 10..... | S2  |
| Compound 12..... | S3  |
| Compound 13..... | S4  |
| Compound 15..... | S5  |
| Compound 16..... | S6  |
| Compound 17..... | S7  |
| Compound 18..... | S8  |
| Compound 19..... | S9  |
| Compound 20..... | S10 |
| Compound 21..... | S11 |
| Compound 23..... | S12 |
| Compound 24..... | S13 |

### Compound 10

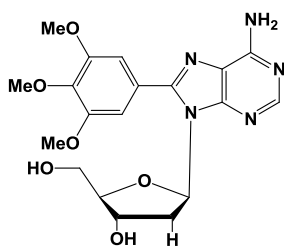

### <sup>1</sup>H NMR

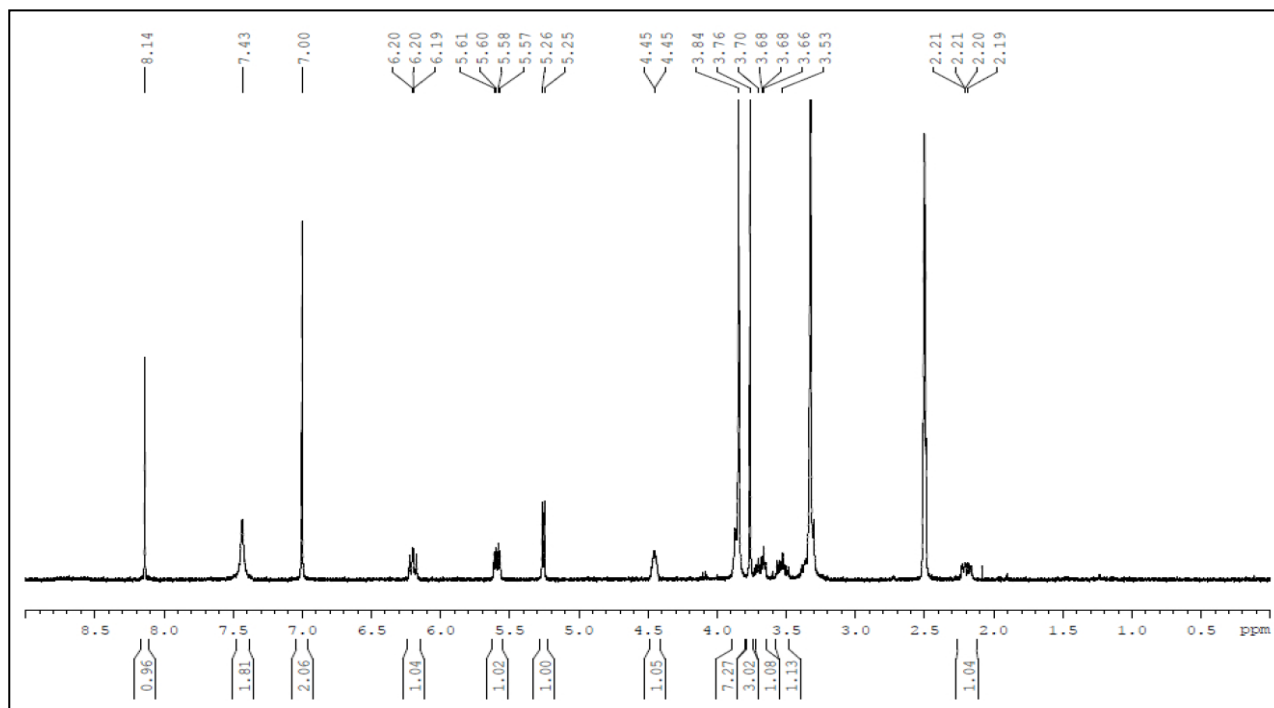

### <sup>13</sup>C NMR

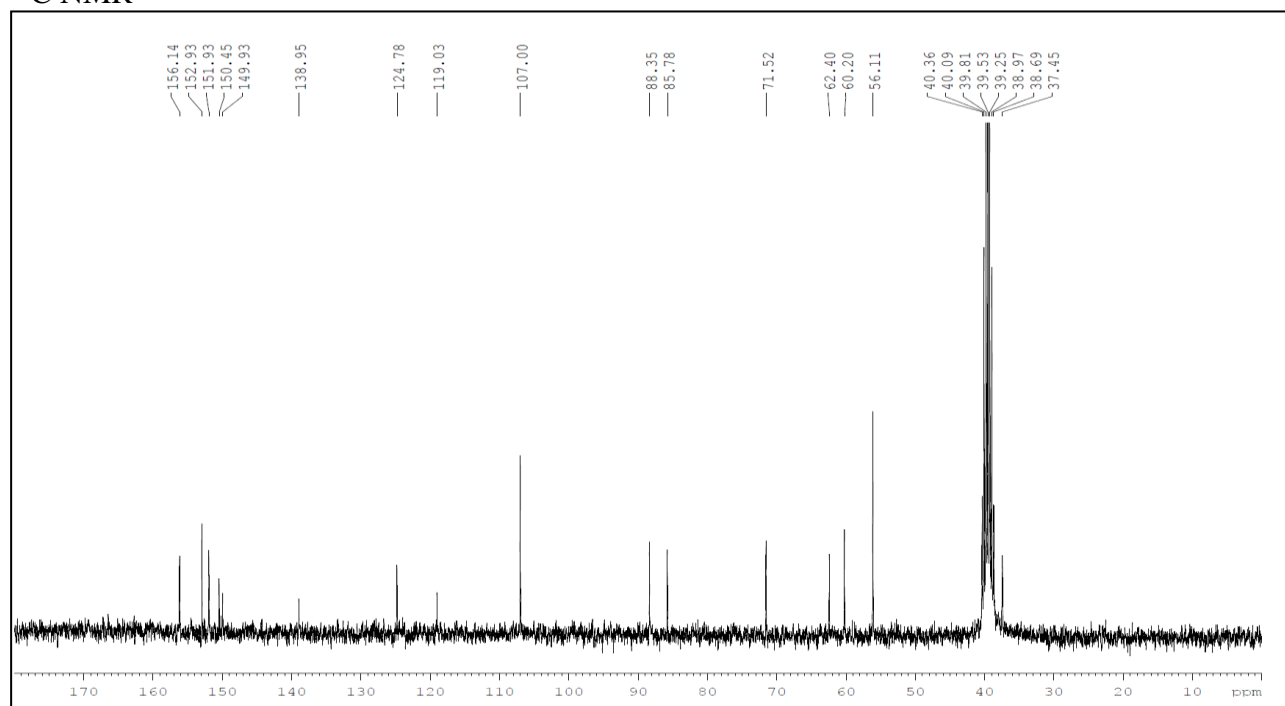

### Compound 12

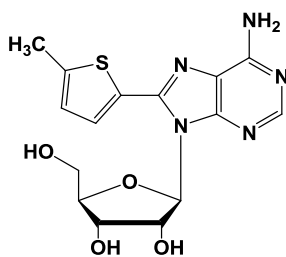

### <sup>1</sup>H NMR

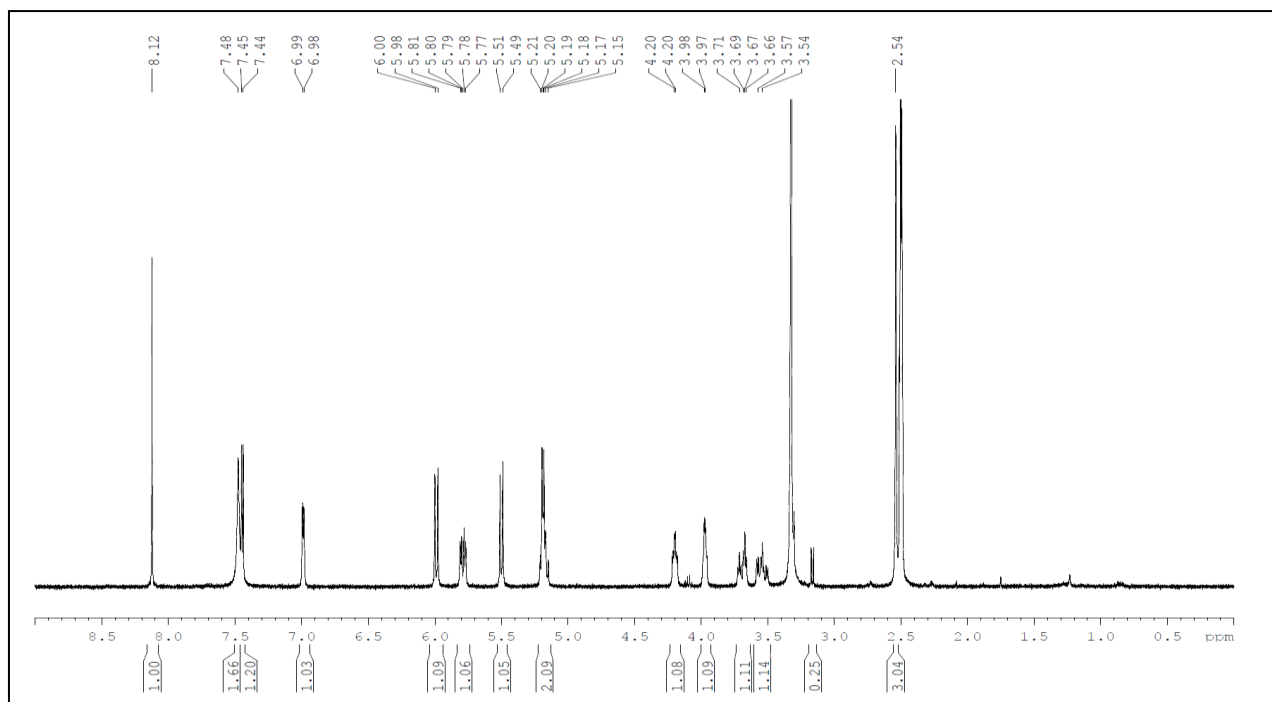

### <sup>13</sup>C NMR

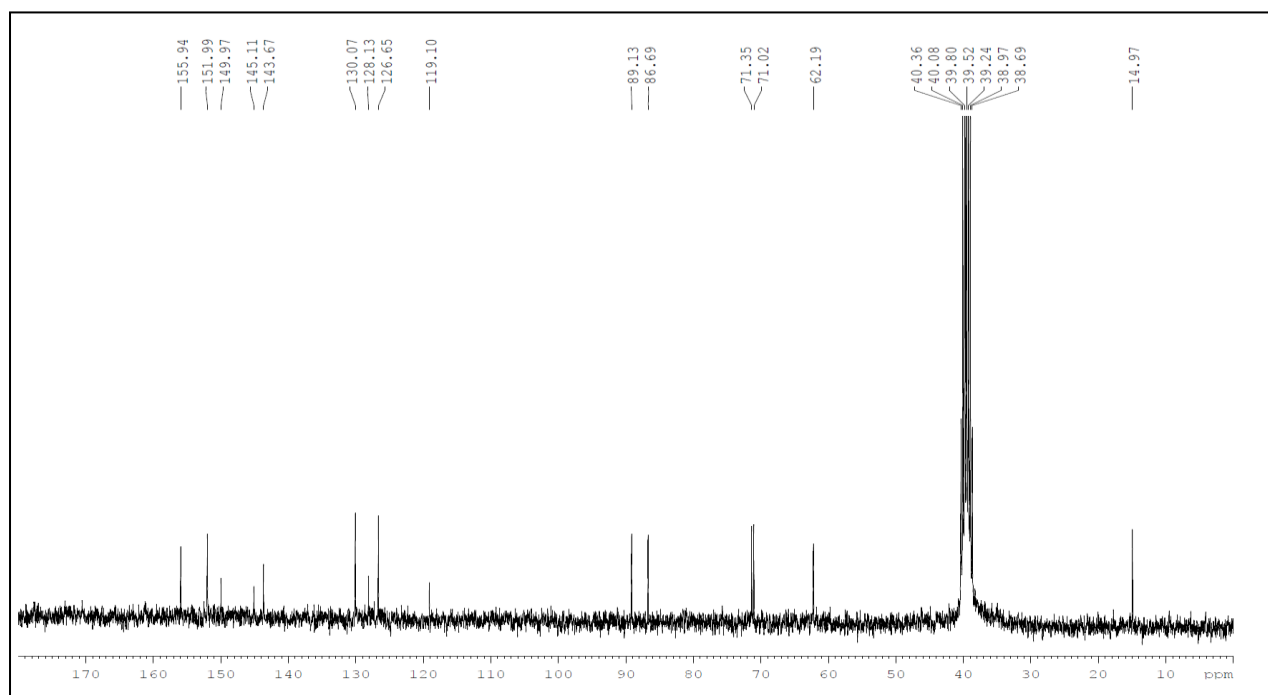

### Compound 13

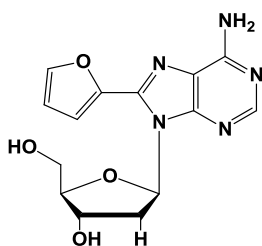

### <sup>1</sup>H NMR

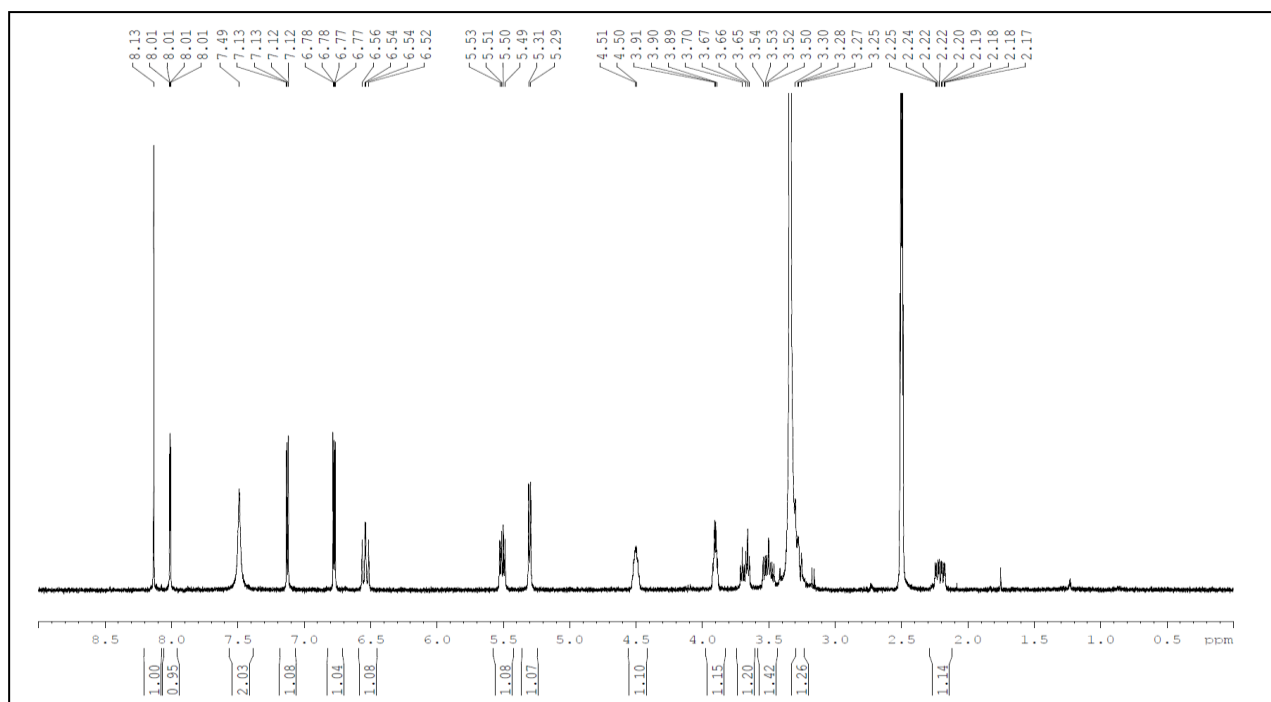

### <sup>13</sup>C NMR

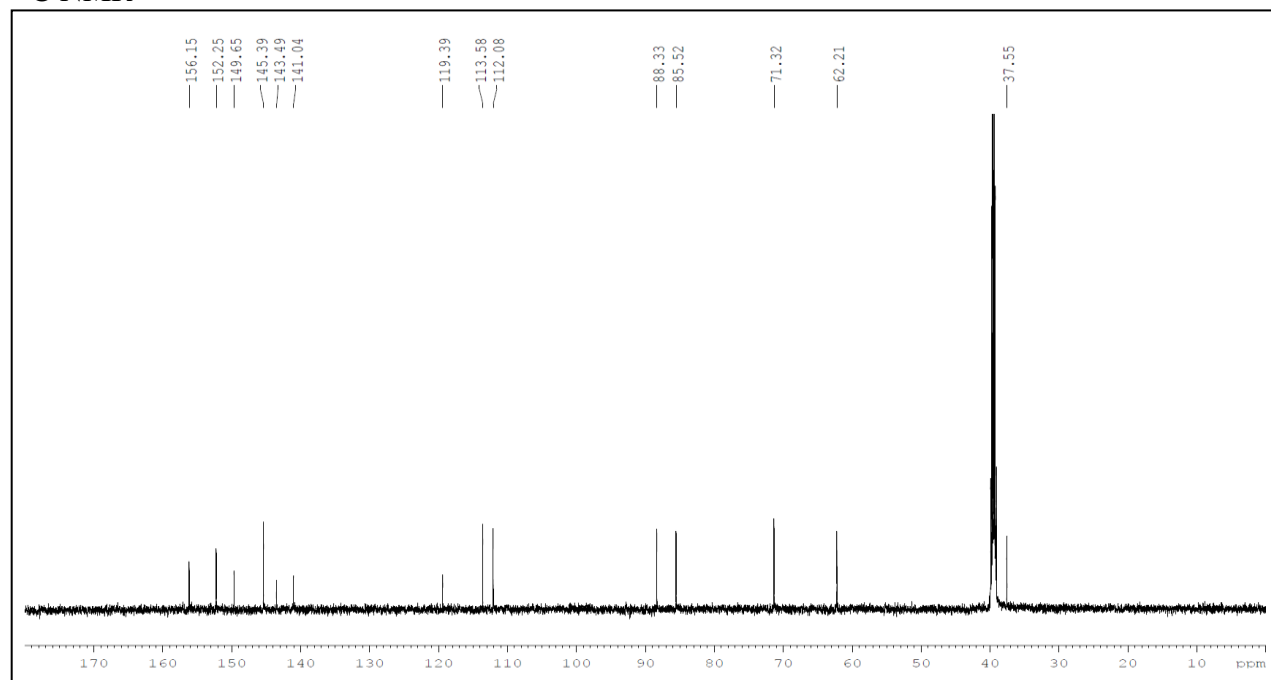

### Compound 15

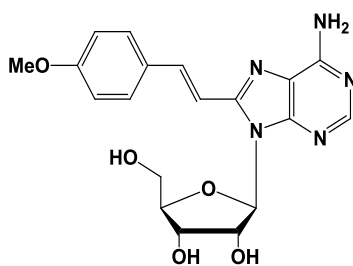

### <sup>1</sup>H NMR

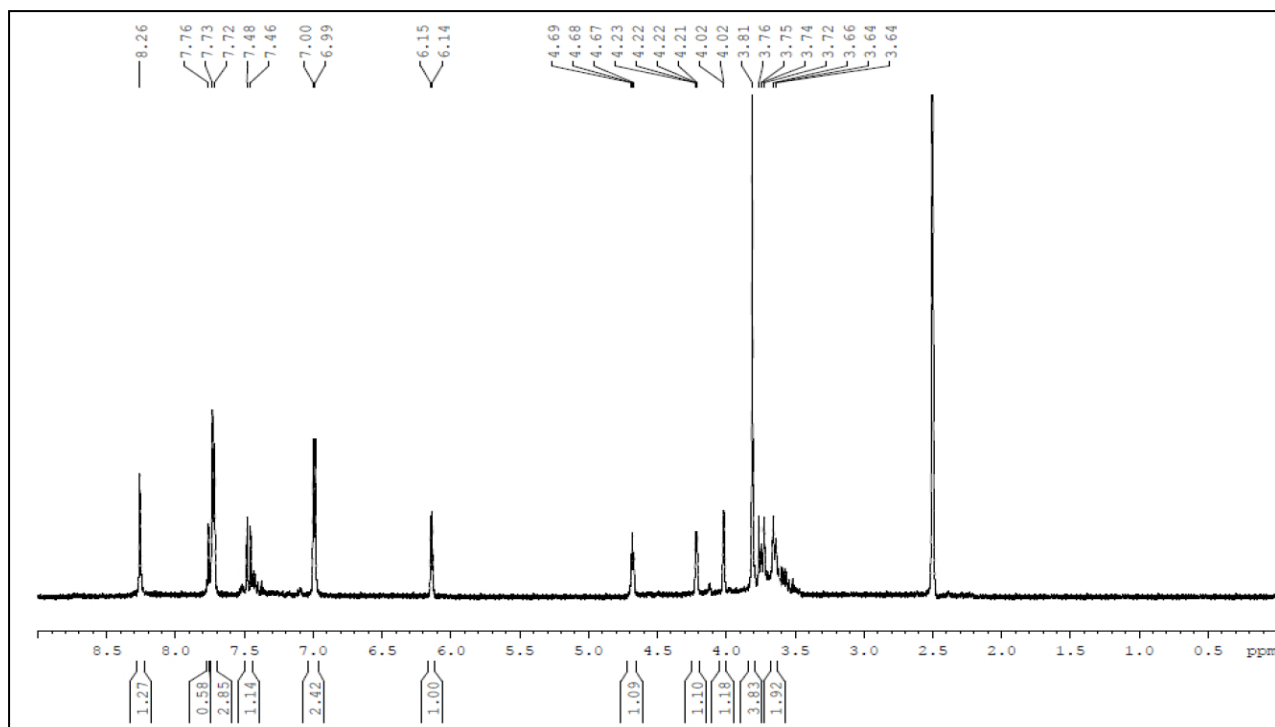

### <sup>13</sup>C NMR

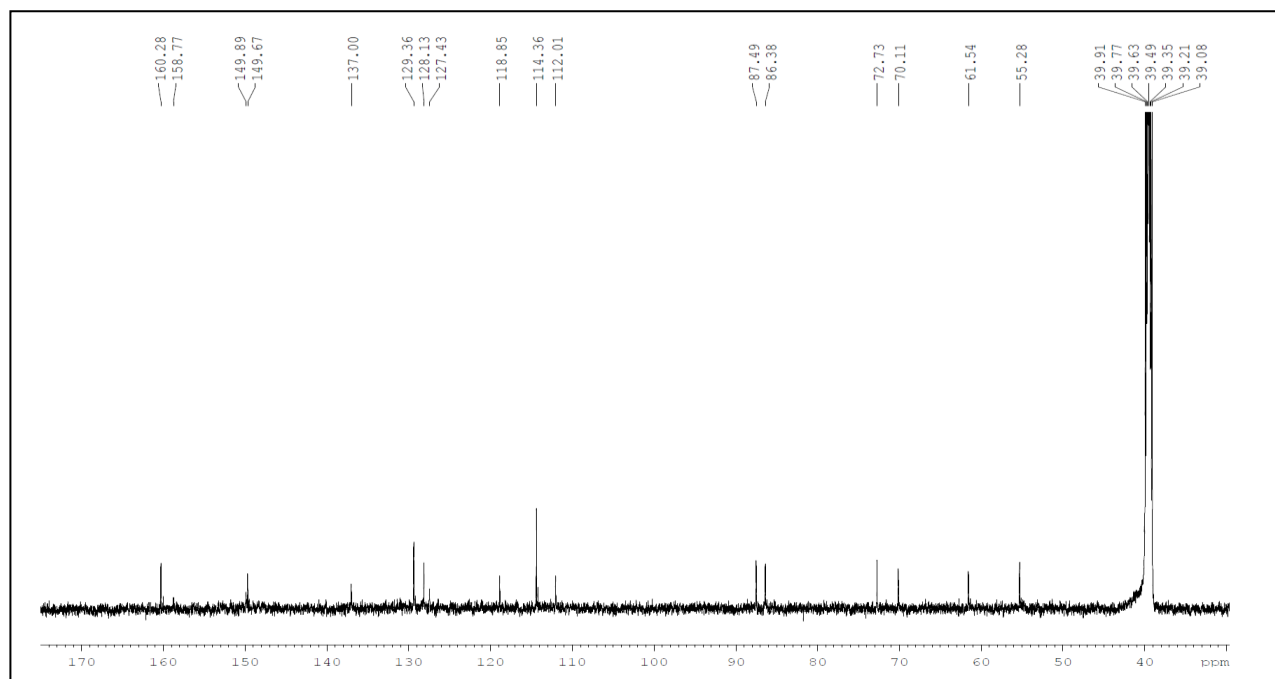

### Compound 16

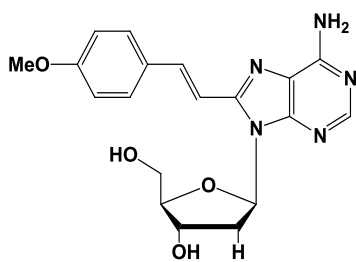

### <sup>1</sup>H NMR

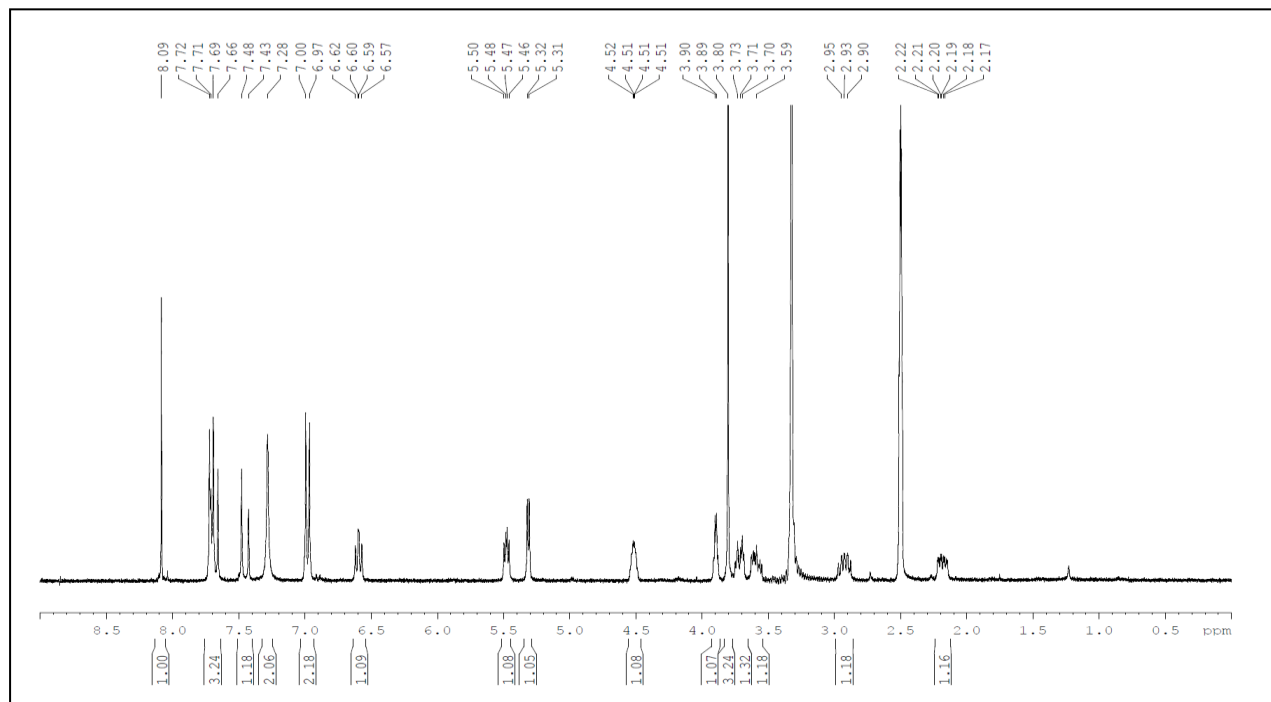

### <sup>13</sup>C NMR

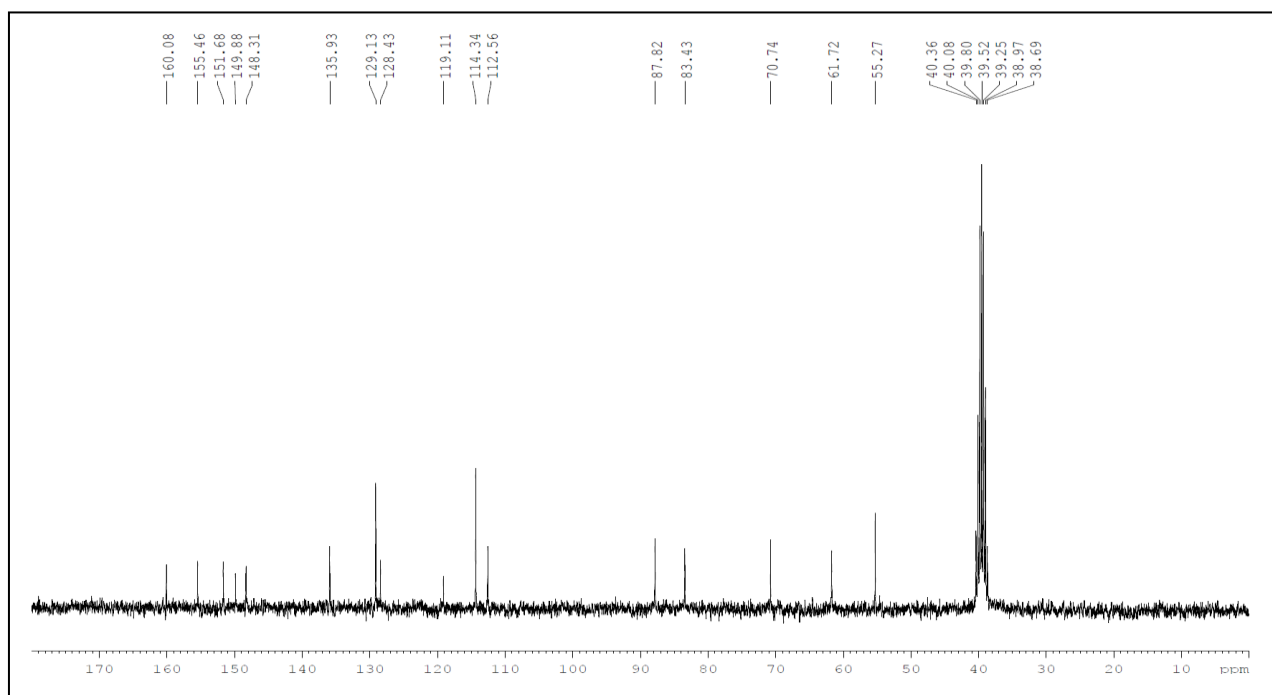

### Compound 17

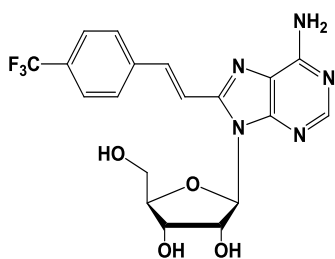

### <sup>1</sup>H NMR

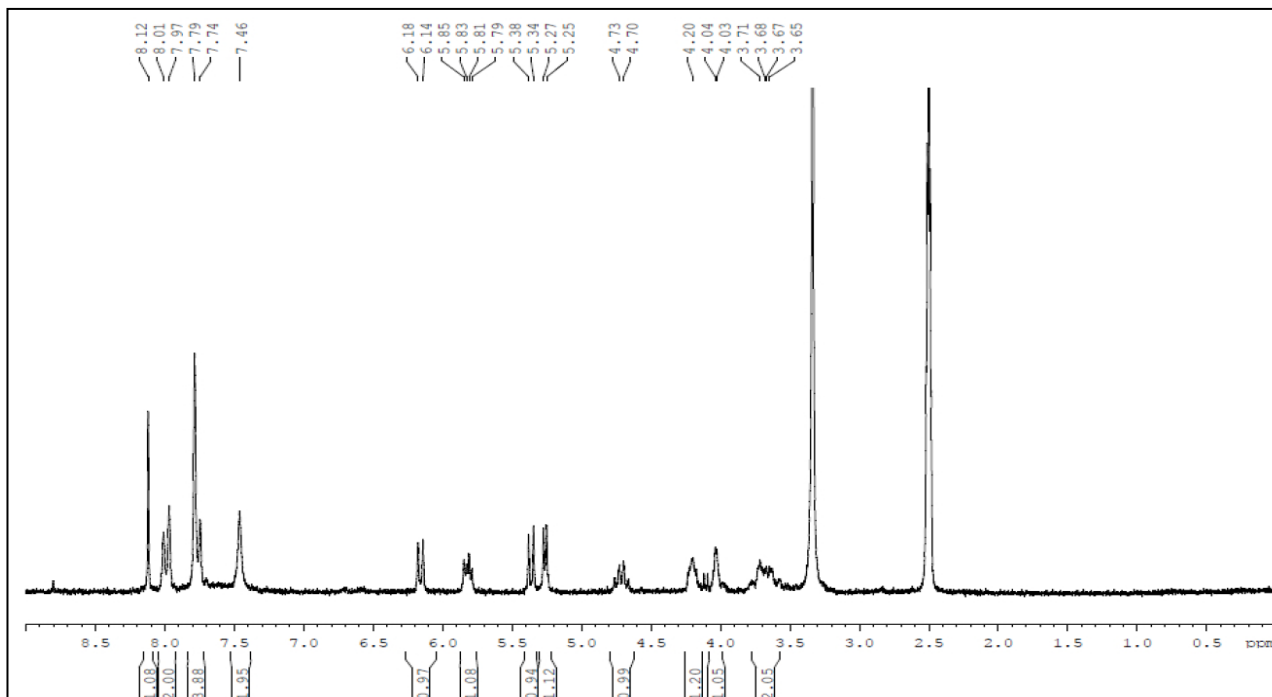

### <sup>13</sup>C NMR

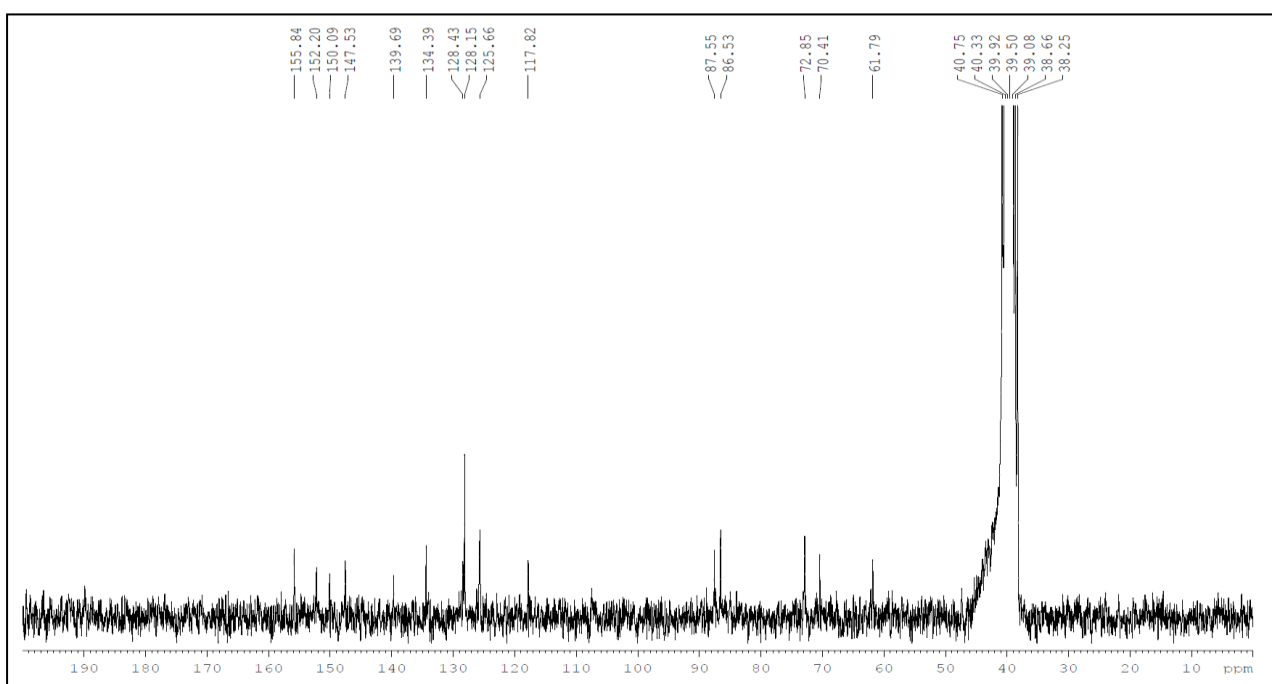

### Compound 18

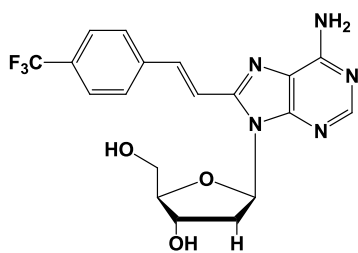

### <sup>1</sup>H NMR

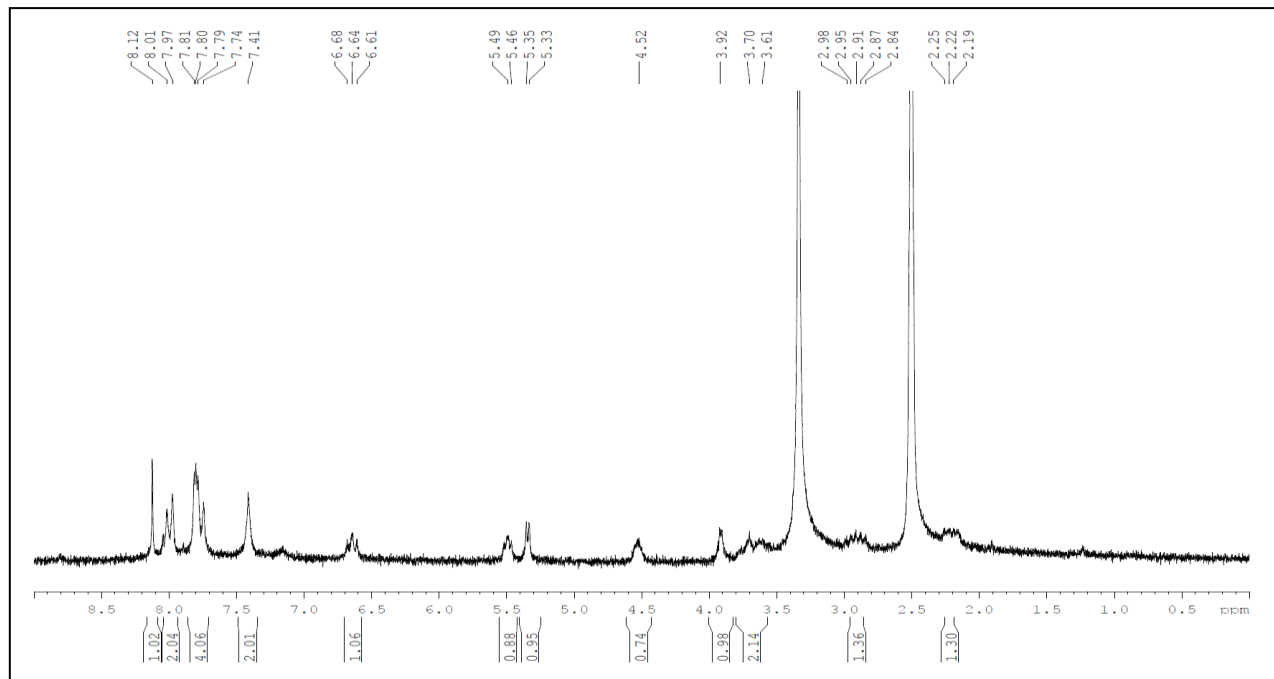

### <sup>13</sup>C NMR

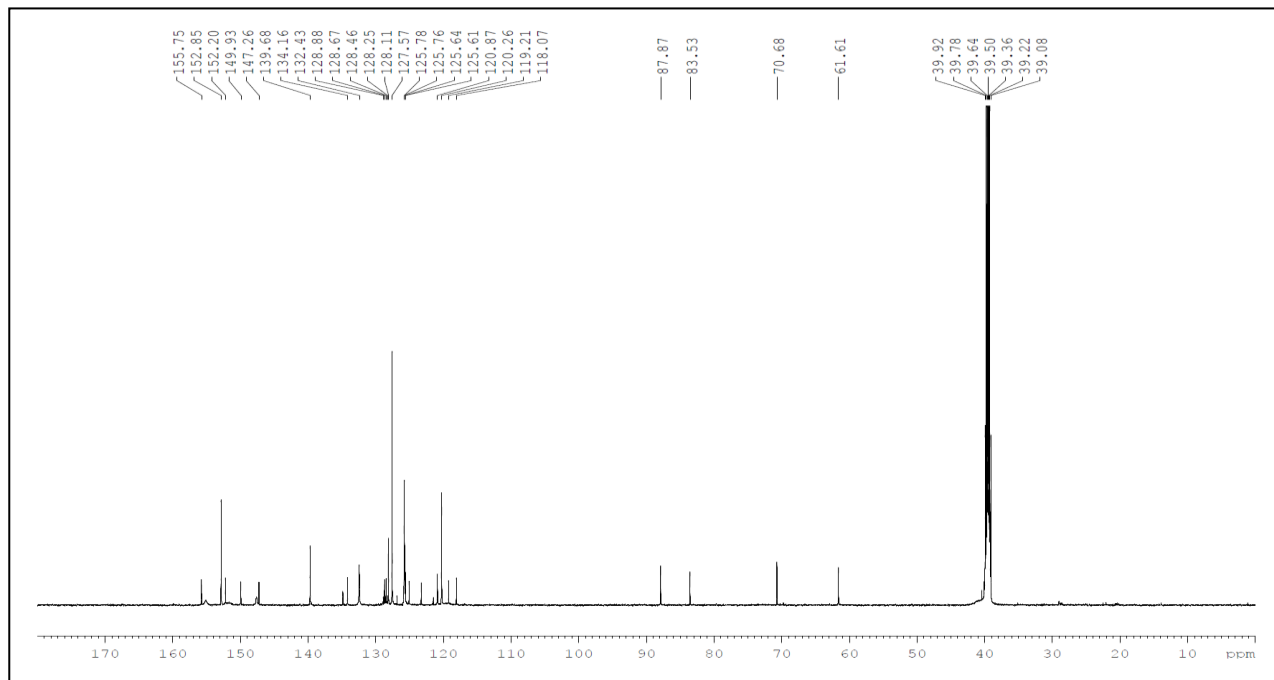



### Compound 19

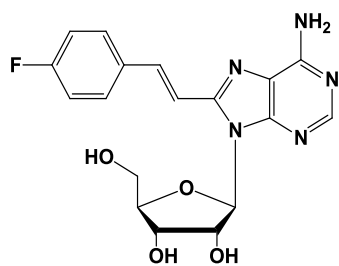

### <sup>1</sup>H NMR

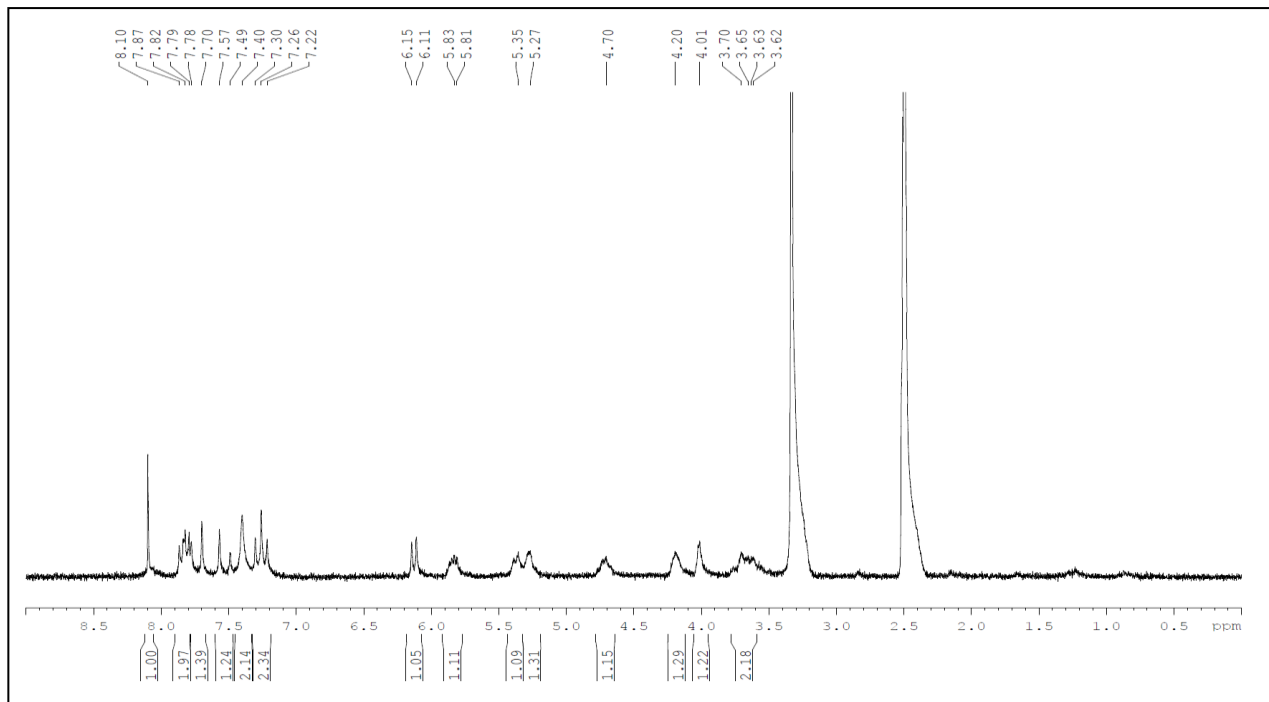

### <sup>13</sup>C NMR

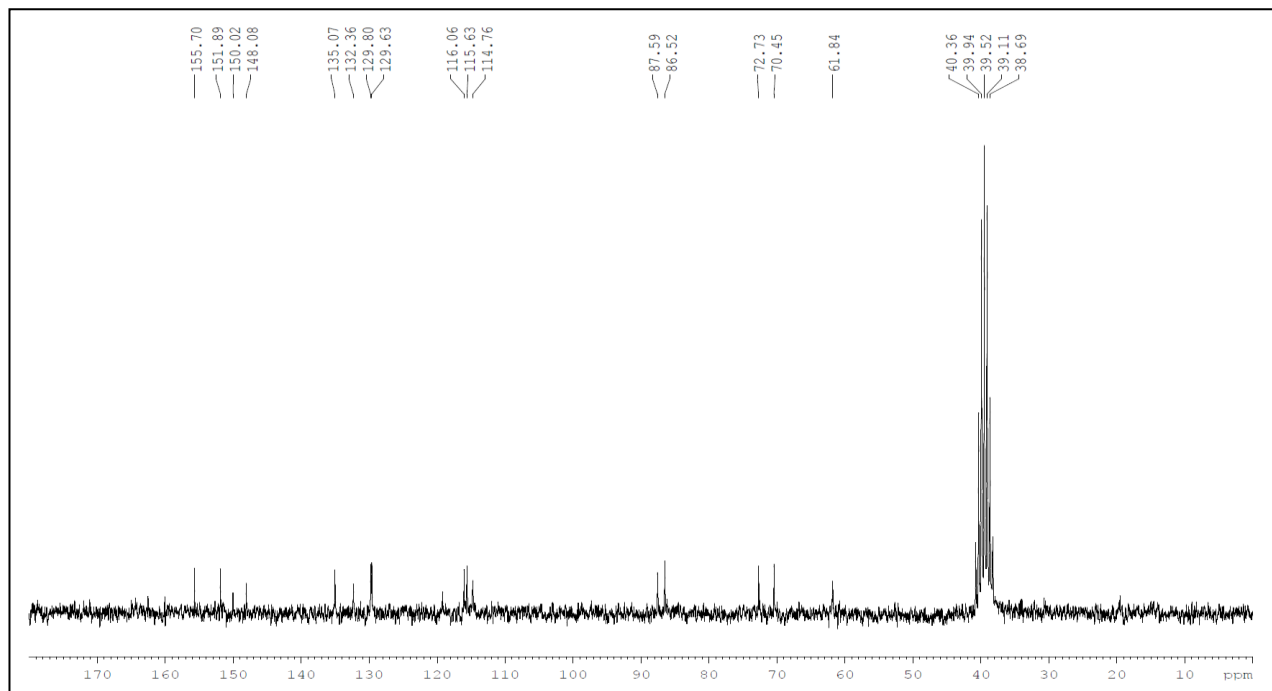

### Compound 20

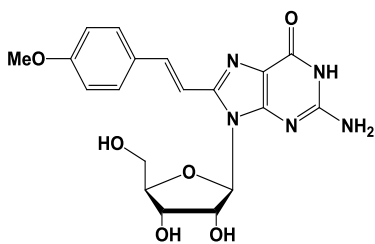

### <sup>1</sup>H NMR

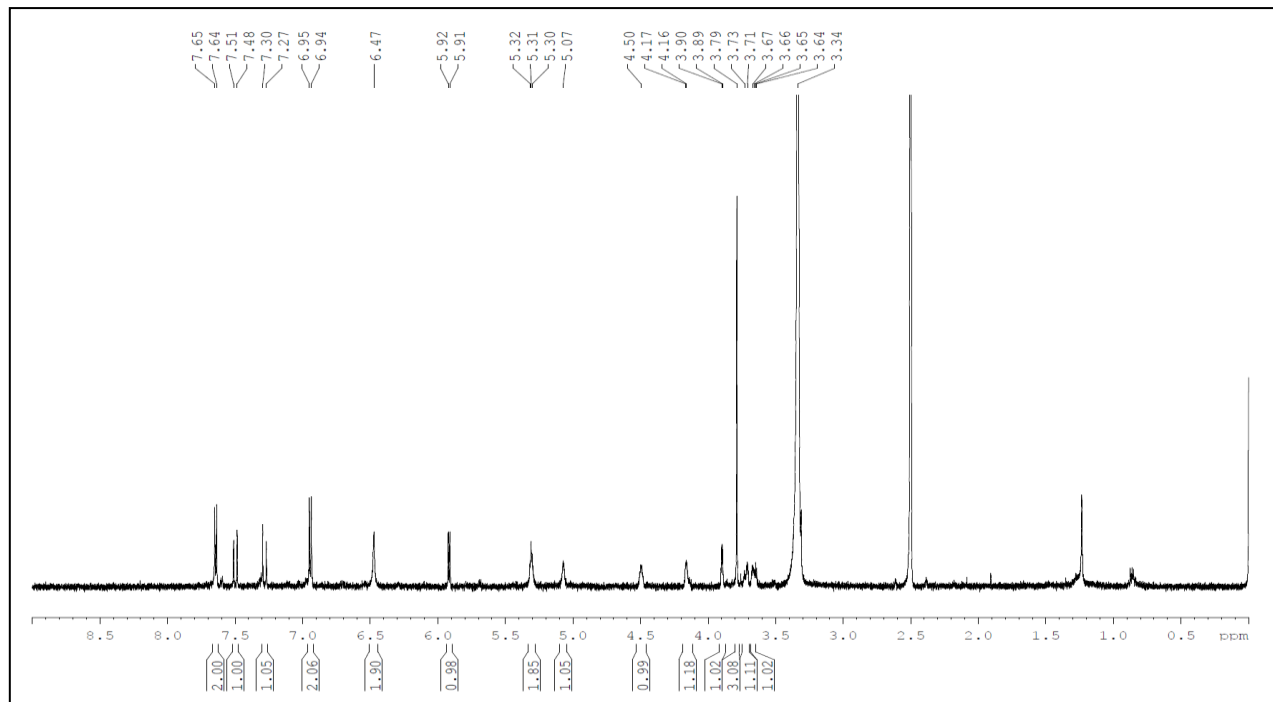

### Compound 21

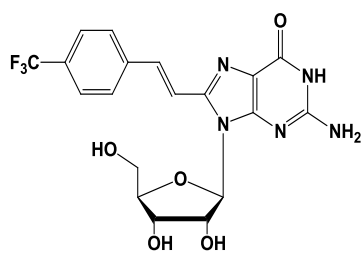

### <sup>1</sup>H NMR

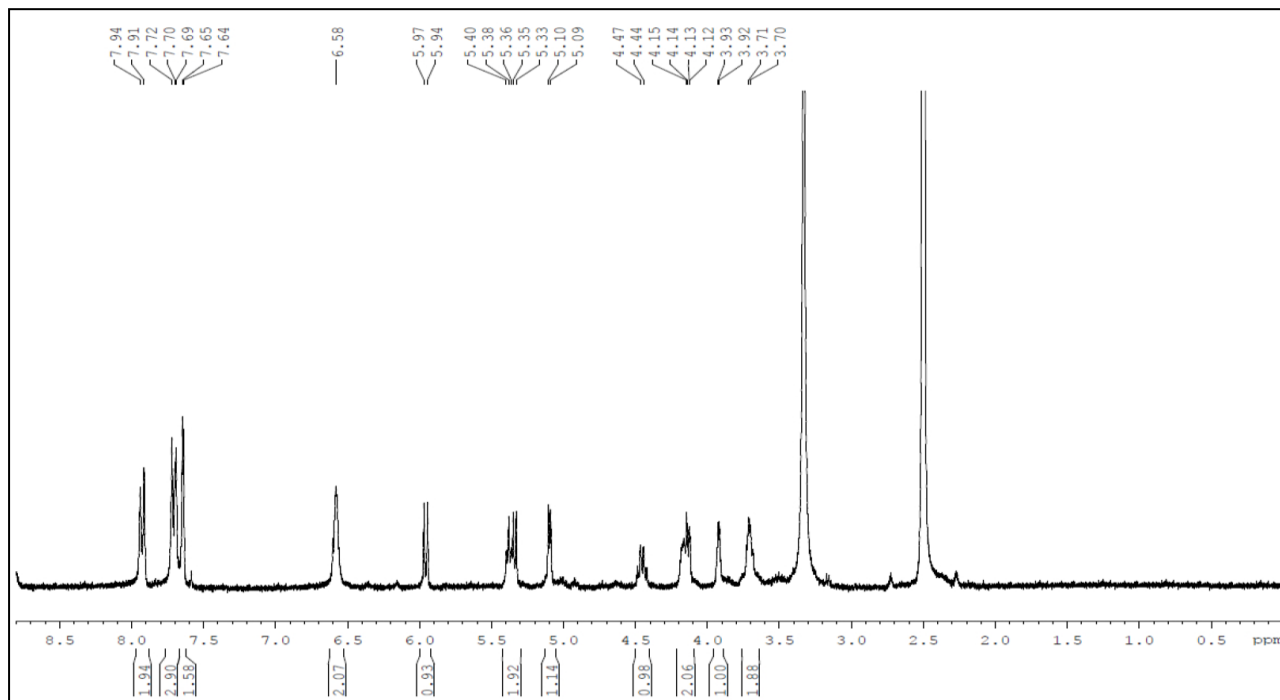

### <sup>13</sup>C NMR

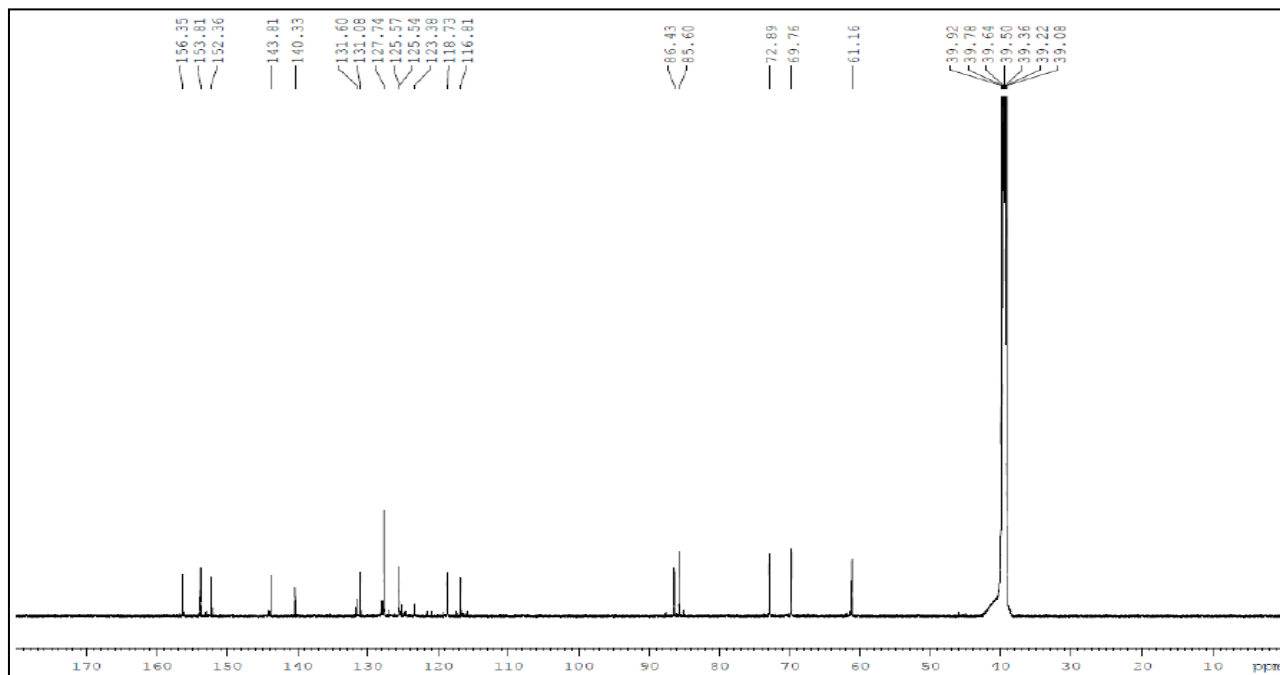

### Compound 23

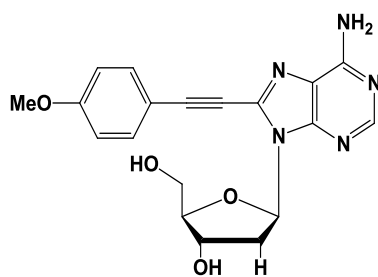

### <sup>1</sup>H NMR

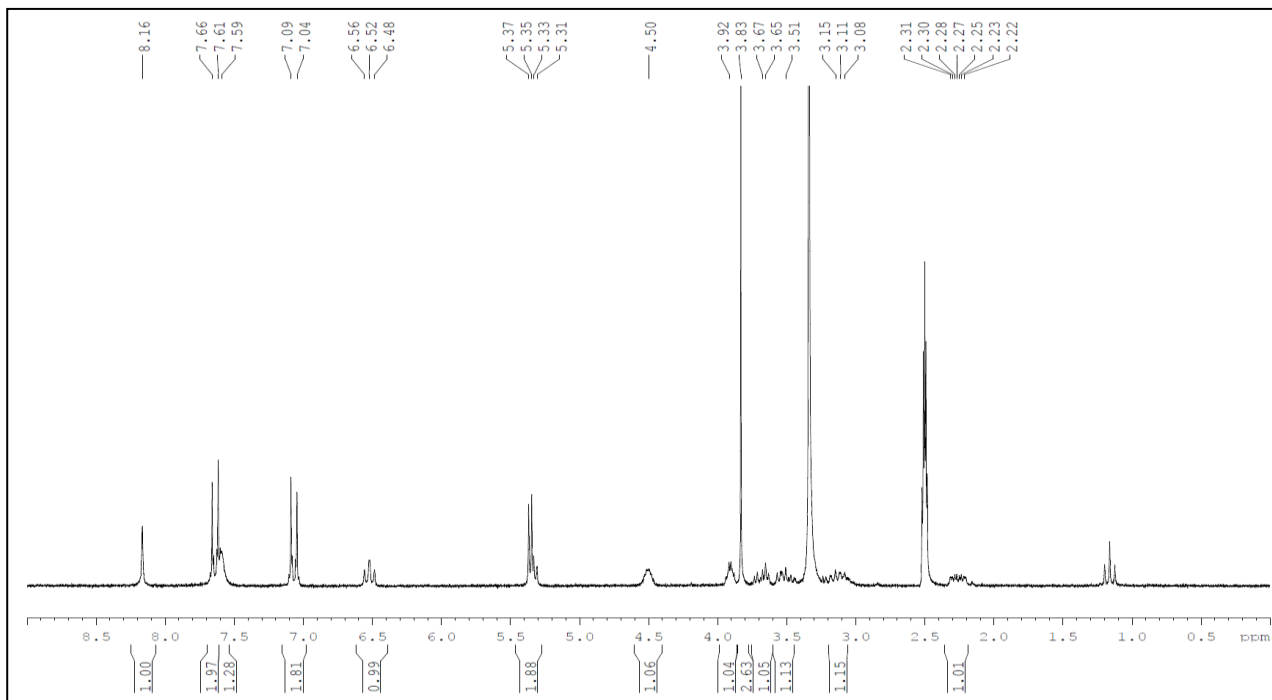

### <sup>13</sup>C NMR

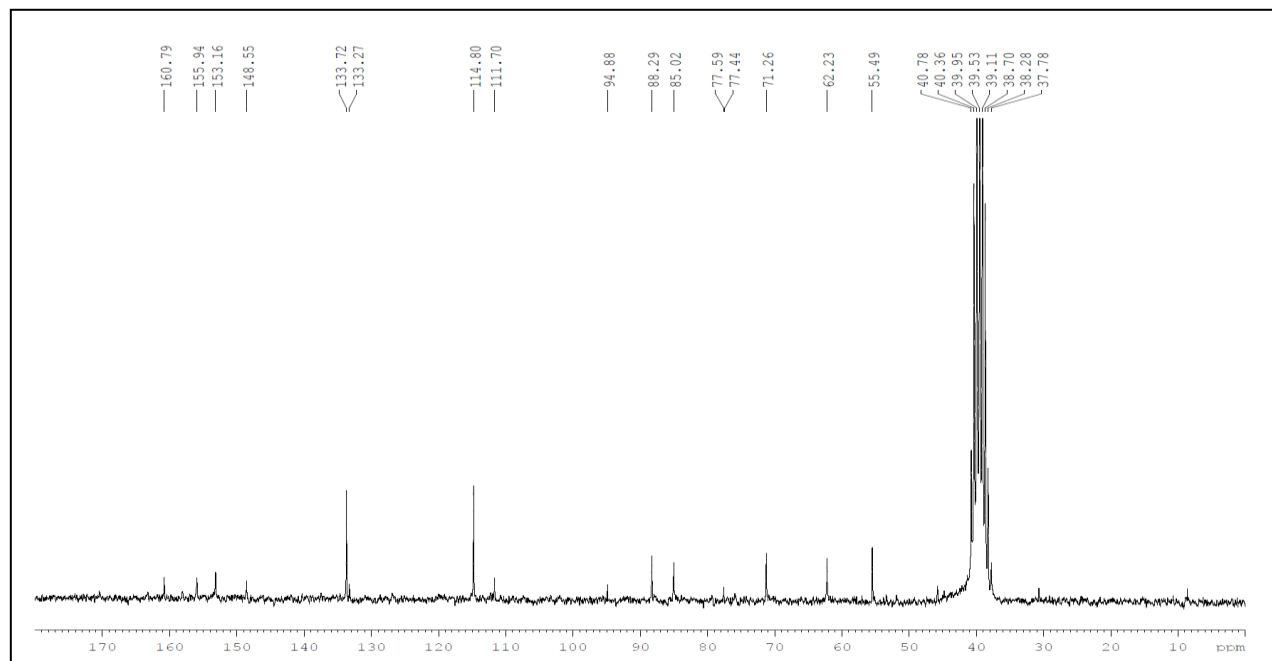

### Compound 24

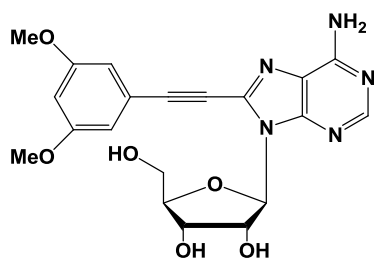

### <sup>1</sup>H NMR

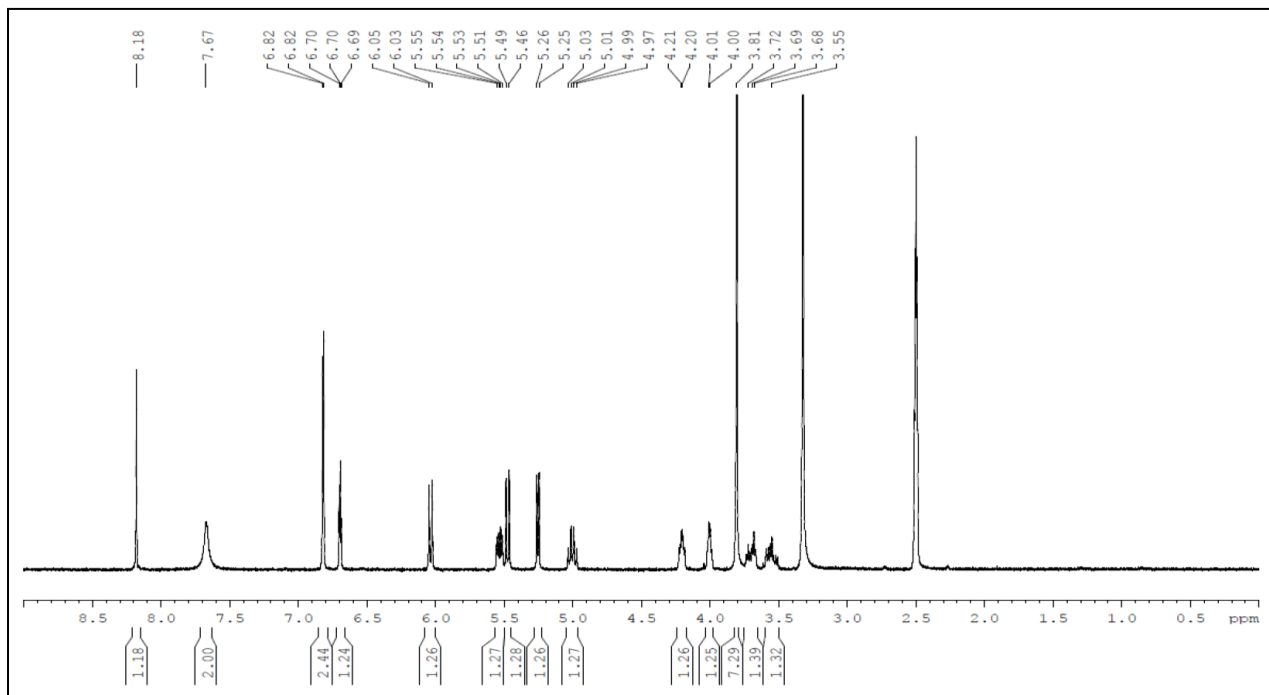

### <sup>13</sup>C NMR

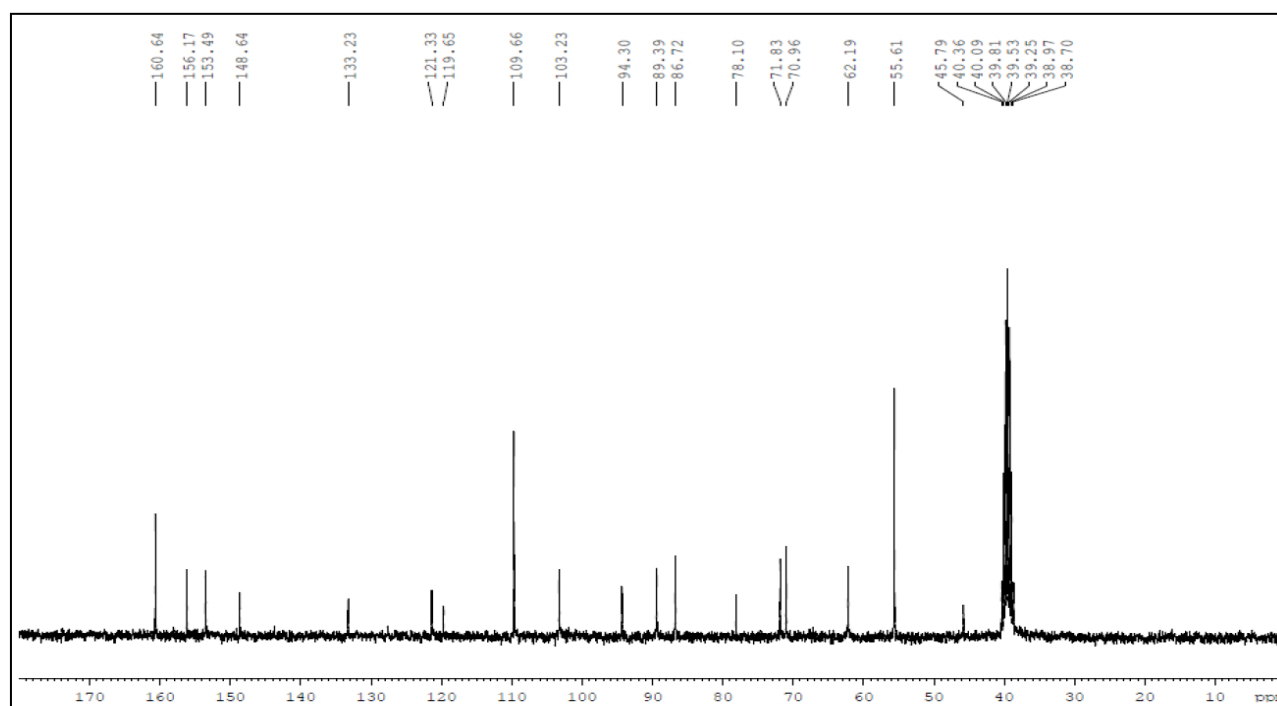

Supplement: c1ob05681f.pdf [file c1ob05681f.pdf]
